# Supplementary material for: Mouse lung automated segmentation tool for quantifying lung tumors after micro-computed tomography
Source: PLoS One. 2021 Jun 17;16(6):e0252950. doi: 10.1371/journal.pone.0252950 (PMC8211241; doi:10.1371/journal.pone.0252950)
Supplement: S5 Table — Manual scoring and MLAST results are shown for vehicle and treatment subjects at week 0 (pre-treatment) and week 3 (post-treatment). Manual scores are shown on a 0–3 scale and MLAST results are shown as % of total thoracic tissue. (XLSX) [file pone.0252950.s006.xlsx]

## Sheet: Sheet1
Group	Subject ID	Score - Baseline	Score - Week 3	MLAST Lung % - Week 0	MLAST Lung % - Week 3
Vehicle	M4666	3	3	30.5492	14.0437
Vehicle	M8387	3	3	25.8163	17.3273
Vehicle	M8388	3	3	33.7523	23.422
Vehicle	M9261	1	2	34.8122	31.4018
Vehicle	M9255	3	3	20.7162	17.0069
Vehicle	M9254	2	3	27.5484	25.6299
Vehicle	M4645	3	3	15.5422	6.12679
Vehicle	M4649	3	3	22.3763	18.0094
Vehicle	M4657
Vehicle	M7491	3	3	15.3617	9.97449
Treatment	M9174	2		31.6772
Treatment	M9175	2	2	30.2395	33.9084
Treatment	M7492	2	2	28.8499	31.5345
Treatment	M7494	1	2	42.5369	44.5545
Treatment	M7493	2	2	19.8218	28.94
Treatment	M3472	2	2	31.6857	40.0844
Treatment	M3475	2	2	31.0994	35.9196
Treatment	M3478	2	3	34.4027	25.7932
Treatment	M3473	2	2	28.2064	36.3894
Treatment	M3477	2		30.7765
